# Supplementary material for: Strain Ratio as a Quantification Tool in Strain Imaging<strong> </strong>
Source: Preprints.org preprint supplement (doi:10.20944/preprints201804.0199.v1), 2018-04-16
Supplement: Supplementary file 2 [file supplementary]

## Sheet: All 
Lesion	NUMBER	Observer	Median SR	Range	IQR	IQR/Median	Benign-Malignant
1: 8 kPa		A	0.52	0.09	0.06	0.118
1: 8 kPa		B	0.68	0.08	0.03	0.044
2: 14 kPa		A	0.96	1.04	0.15	0.156
2: 14 kPa		B	0.82	0.1	0.06	0.073
3: 45 kPa		A	1.91	0.18	0.12	0.063
3: 45 kPa		B	1.35	0.11	0.04	0.03
4: 80 kPa		A	2.5	0.91	0.17	0.068
4: 80 kPa		B	2.82	0.24	0.07	0.025
Adenoma	4		1.25	1.38	1.1	0.88
Crohn	16		2.09	21.44	0.64	0.31
Adenocarcinoma	18		2.18	4.53	1.44	0.66
EUS NET indetermined or benign	11		2.19	7.93	2.8	1.28	1
EUS NET malignant	7		5.74	17.5	13.1	2.28	2
EUS Adeno-carcinoma	11		8.36	24.5	10.9	1.3	2
EUS Focal pancreatitis	8		0.91	8.33	3.55	3.68	1
EUS Other benign lesion	11		3.34	35.3	5.53	1.66	1

## Sheet: Phantom inclusions
Lesion	NUMBER	Observer	Median SR	Range	IQR	IQR/Median
1: 8 kPa		A	0.52	0.09	0.06	0.118
1: 8 kPa		B	0.68	0.08	0.03	0.044
2: 14 kPa		A	0.96	1.04	0.15	0.156
2: 14 kPa		B	0.82	0.1	0.06	0.073
3: 45 kPa		A	1.91	0.18	0.12	0.063
3: 45 kPa		B	1.35	0.11	0.04	0.03
4: 80 kPa		A	2.5	0.91	0.17	0.068
4: 80 kPa		B	2.82	0.24	0.07	0.025

## Sheet: Surgical specimens
Lesion	Number	Observer	MedianSR	Range	IQR	IQRMedian
Adenoma	4	A	1.25	1.38	1.1	0.88
Crohn	16	A	2.09	21.44	0.64	0.31
Adenocarcinoma	18	A	2.18	4.53	1.44	0.66

## Sheet: EUS elasto pancreatic lesions
Lesion	Number	Observer	Median SR	Range	IQR	IQR/Median	Benign-malignant
NET indetermined or benign	11	A	2.19	7.93	2.8	1.28	1
NET malignant	7	A	5.74	17.5	13.1	2.28	2
Adeno-carcinoma	11	A	8.36	24.5	10.9	1.3	2
Focal pancreatitis	8	A	0.91	8.33	3.55	3.68	1
Other benign lesion	11	A	3.34	35.3	5.53	1.66	1
